# Supplementary material
Source: HighWire-hosted journal article supplement (https://bmjopen.bmj.com/content/9/1/e026564)
Supplement: inline-supplementary-material-1 [file inline-supplementary-material-1.pdf]

# Metabolic B12 Deficiency, Homocysteine, Age And Stroke Subtypes In Outpatients With Stroke/TIA

Shamon Ahmed , Chrysi Bogiatzi, Daniel G. Hackam, Luciano A. Sposato, Alexander Khaw,  
Jennifer Mandzia, M. Reza Azarpazhoo, Vladimir Hachinski, J. David Spence

## Supplementary Material

### Consort diagram

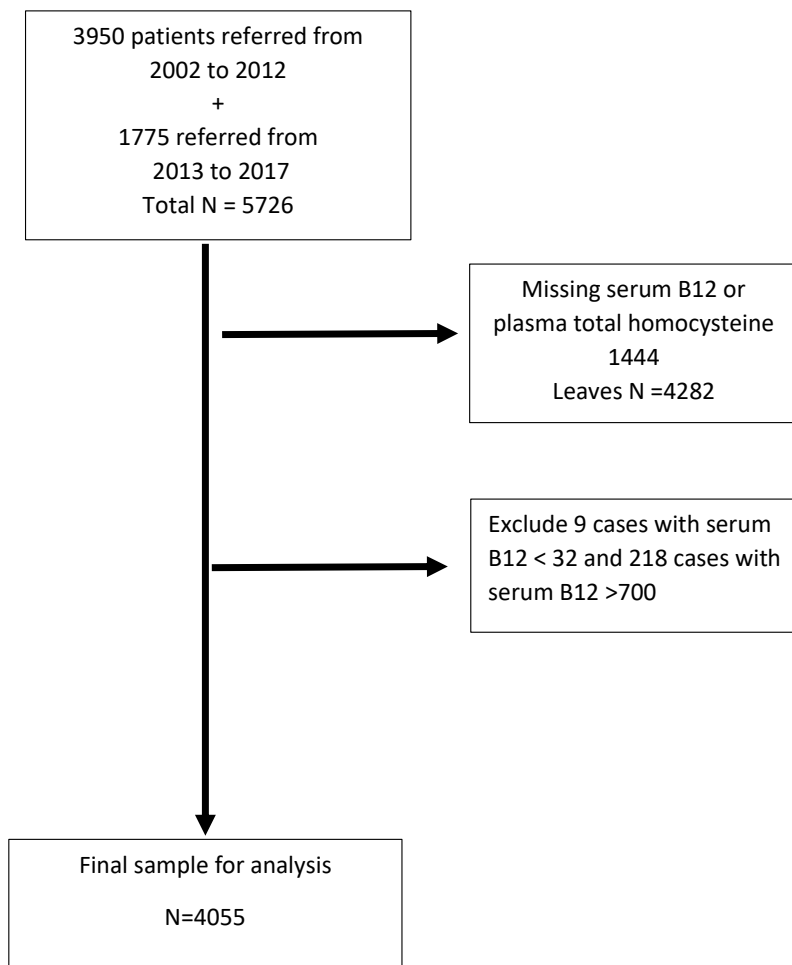

**eFigure 1. Distributions of serum B12 before and after 2009**

From 2009 onward there were many more patients with unphysiologically high serum B12, indicating the use of B12 supplements.

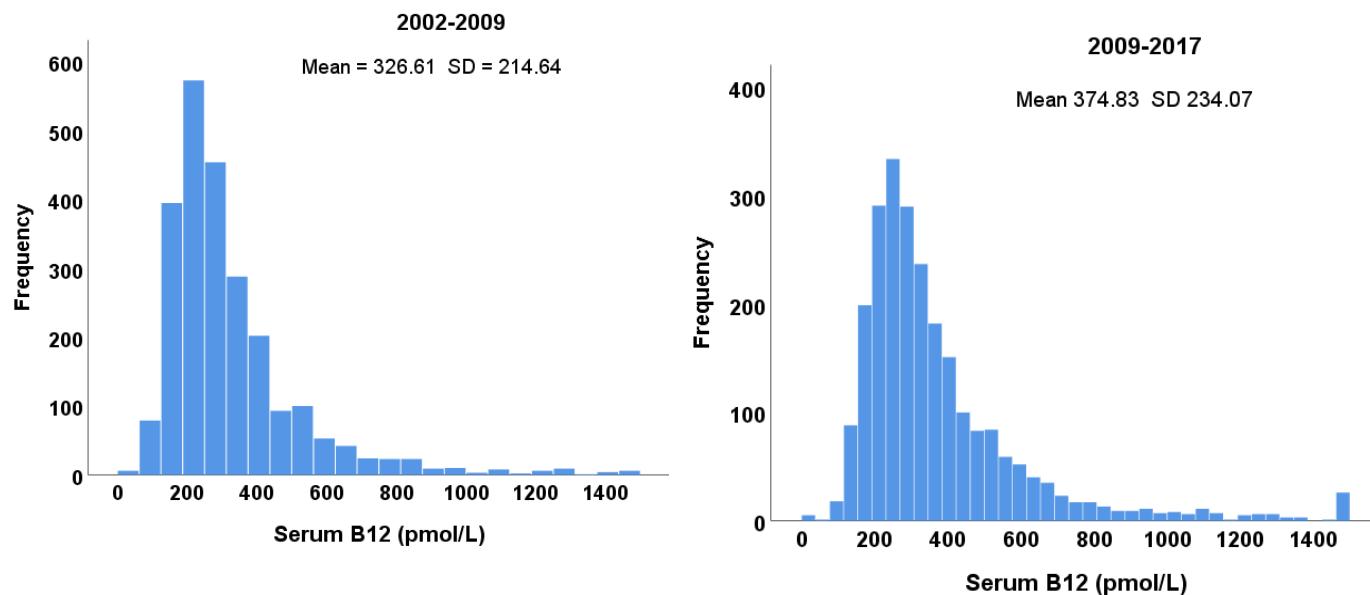

Results for all patients, including those with serum B12 >700

**eTable 1. Age groups, Hyperhomocysteinemia and Metabolic B12 Deficiency**

|                          | Age group |       |       |       |       | p          |
|--------------------------|-----------|-------|-------|-------|-------|------------|
|                          | <50       | 50-60 | 60-70 | 70-80 | >=80  | Chi-Square |
| tHcy $\geq 14$           | 7.2%      | 11.2% | 16.3% | 22.0% | 34.1% | 0.0001     |
| Metabolic B12 deficiency | 3.8%      | 5.0%  | 8.5%  | 10.8% | 14.5% | 0.0001     |

**eTable 2. Stroke subtypes, Hyperhomocysteinemia and Metabolic B12 Deficiency**

|                          | Large Artery Disease | Cardioembolic | Small Vessel Disease | Other rare or unusual etiologies | Undetermined | p      |
|--------------------------|----------------------|---------------|----------------------|----------------------------------|--------------|--------|
| tHcy $\geq 14$           | 22.9%                | 18.1%         | 16.5%                | 10.7%                            | 13.4%        | 0.0001 |
| Metabolic B12 deficiency | 12.6%                | 8.9%          | 8.2%                 | 5.3%                             | 7.8%         | 0.002  |

## Post Hoc Tests for Table 3

### Homogeneous Subsets

#### Age

Tukey B<sup>a,b</sup>

| Subtype                          | N    | Subset for alpha = 0.05 |       |       |       |
|----------------------------------|------|-------------------------|-------|-------|-------|
|                                  |      | 1                       | 2     | 3     | 4     |
| Other rare or unusual etiologies | 202  | 53.32                   |       |       |       |
| Cardioembolic                    | 1290 |                         | 62.23 |       |       |
| Undetermined                     | 515  |                         | 64.02 | 64.02 |       |
| Small Vessel Disease             | 329  |                         |       | 65.94 |       |
| Large Artery Disease             | 1074 |                         |       |       | 70.08 |

Means for groups in homogeneous subsets are displayed.

a. Uses Harmonic Mean Sample Size = 429.625.

b. The group sizes are unequal. The harmonic mean of the group sizes is used. Type I error levels are not guaranteed.

#### Systolic pressure

Tukey B<sup>a,b</sup>

| Subtype                          | N   | Subset for alpha = 0.05 |          |
|----------------------------------|-----|-------------------------|----------|
|                                  |     | 1                       | 2        |
| Cardioembolic                    | 256 | 135.3984                |          |
| Other rare or unusual etiologies | 30  | 140.6667                |          |
| Undetermined                     | 86  | 142.6977                |          |
| Large Artery Disease             | 228 | 143.8202                |          |
| Small Vessel Disease             | 69  |                         | 157.5217 |

Means for groups in homogeneous subsets are displayed.

a. Uses Harmonic Mean Sample Size = 73.805.

b. The group sizes are unequal. The harmonic mean of the group sizes is used. Type I error levels are not guaranteed.

**Diastolic pressure**Tukey B<sup>a,b</sup>

| Subtype                          | N   | Subset for alpha = 0.05 |         |
|----------------------------------|-----|-------------------------|---------|
|                                  |     | 1                       | 2       |
| Cardioembolic                    | 256 | 79.1563                 |         |
| Large Artery Disease             | 228 | 80.2588                 |         |
| Undetermined                     | 86  | 81.1512                 |         |
| Other rare or unusual etiologies | 30  | 81.7667                 | 81.7667 |
| Small Vessel Disease             | 69  |                         | 86.4783 |

Means for groups in homogeneous subsets are displayed.

a. Uses Harmonic Mean Sample Size = 73.805.

b. The group sizes are unequal. The harmonic mean of the group sizes is used. Type I error levels are not guaranteed.

**Total cholesterol**Tukey B<sup>a,b</sup>

| Subtype                          | N   | Subset for alpha = 0.05 |        |
|----------------------------------|-----|-------------------------|--------|
|                                  |     | 1                       | 2      |
| Large Artery Disease             | 604 | 4.7065                  |        |
| Cardioembolic                    | 745 | 4.7445                  | 4.7445 |
| Small Vessel Disease             | 197 | 4.9277                  | 4.9277 |
| Undetermined                     | 249 | 4.9613                  | 4.9613 |
| Other rare or unusual etiologies | 87  |                         | 5.0437 |

Means for groups in homogeneous subsets are displayed.

a. Uses Harmonic Mean Sample Size = 212.005.

b. The group sizes are unequal. The harmonic mean of the group sizes is used. Type I error levels are not guaranteed.

**Triglycerides**Tukey B<sup>a,b</sup>

| Subtype                          | N   | Subset for alpha = 0.05 |        |
|----------------------------------|-----|-------------------------|--------|
|                                  |     | 1                       |        |
| Cardioembolic                    | 745 |                         | 1.6903 |
| Undetermined                     | 249 |                         | 1.8494 |
| Other rare or unusual etiologies | 87  |                         | 1.8679 |
| Large Artery Disease             | 604 |                         | 1.9404 |
| Small Vessel Disease             | 198 |                         | 2.0272 |

Means for groups in homogeneous subsets are displayed.

a. Uses Harmonic Mean Sample Size = 212.236.

b. The group sizes are unequal. The harmonic mean of the group sizes is used. Type I error levels are not guaranteed.

### HDL cholesterol

Tukey B<sup>a,b</sup>

| Subtype                          | N   | Subset for alpha = 0.05 |        |
|----------------------------------|-----|-------------------------|--------|
|                                  |     | 1                       |        |
| Large Artery Disease             | 602 |                         | 1.2794 |
| Other rare or unusual etiologies | 87  |                         | 1.2867 |
| Small Vessel Disease             | 197 |                         | 1.3439 |
| Cardioembolic                    | 745 |                         | 1.3467 |
| Undetermined                     | 249 |                         | 1.3734 |

Means for groups in homogeneous subsets are displayed.

a. Uses Harmonic Mean Sample Size = 211.955.

b. The group sizes are unequal. The harmonic mean of the group sizes is used. Type I error levels are not guaranteed.

### LDL cholesterol

Tukey B<sup>a,b</sup>

| Subtype                          | N   | Subset for alpha = 0.05 |        |
|----------------------------------|-----|-------------------------|--------|
|                                  |     | 1                       | 2      |
| Large Artery Disease             | 582 | 2.5967                  |        |
| Cardioembolic                    | 735 | 2.6446                  | 2.6446 |
| Small Vessel Disease             | 191 | 2.7064                  | 2.7064 |
| Undetermined                     | 244 | 2.7931                  | 2.7931 |
| Other rare or unusual etiologies | 86  |                         | 2.8935 |

Means for groups in homogeneous subsets are displayed.

a. Uses Harmonic Mean Sample Size = 207.981.

b. The group sizes are unequal. The harmonic mean of the group sizes is used. Type I error levels are not guaranteed.

### Smoking (pack-years)

Tukey B<sup>a,b</sup>

| Subtype                          | N   | Subset for alpha = 0.05 |        |
|----------------------------------|-----|-------------------------|--------|
|                                  |     | 1                       | 2      |
| Other rare or unusual etiologies | 27  | 11.056                  |        |
| Undetermined                     | 75  | 16.157                  | 16.157 |
| Cardioembolic                    | 188 | 17.617                  | 17.617 |
| Small Vessel Disease             | 60  |                         | 21.033 |
| Large Artery Disease             | 199 |                         | 25.292 |

Means for groups in homogeneous subsets are displayed.

a. Uses Harmonic Mean Sample Size = 64.615.

b. The group sizes are unequal. The harmonic mean of the group sizes is used. Type I error levels are not guaranteed.

**Serum B12**Tukey B<sup>a,b</sup>

| Subtype                          | N    | Subset for alpha = 0.05 |        |
|----------------------------------|------|-------------------------|--------|
|                                  |      | 1                       |        |
| Other rare or unusual etiologies | 202  |                         | 291.95 |
| Small Vessel Disease             | 329  |                         | 294.10 |
| Large Artery Disease             | 1074 |                         | 298.44 |
| Cardioembolic                    | 1290 |                         | 300.47 |
| Undetermined                     | 515  |                         | 302.71 |

Means for groups in homogeneous subsets are displayed.

a. Uses Harmonic Mean Sample Size = 429.625.

b. The group sizes are unequal. The harmonic mean of the group sizes is used. Type I error levels are not guaranteed.

**Total Homocysteine**Tukey B<sup>a,b</sup>

| Subtype                          | N    | Subset for alpha = 0.05 |        |        |
|----------------------------------|------|-------------------------|--------|--------|
|                                  |      | 1                       | 2      | 3      |
| Other rare or unusual etiologies | 184  | 9.203                   |        |        |
| Undetermined                     | 489  |                         | 10.280 |        |
| Cardioembolic                    | 1214 |                         | 10.913 |        |
| Small Vessel Disease             | 313  |                         | 11.044 |        |
| Large Artery Disease             | 1017 |                         |        | 11.957 |

Means for groups in homogeneous subsets are displayed.

a. Uses Harmonic Mean Sample Size = 400.587.

b. The group sizes are unequal. The harmonic mean of the group sizes is used. Type I error levels are not guaranteed.

**Plasma Creatinine (μmol/L)**Tukey B<sup>a,b</sup>

| Subtype                          | N   | Subset for alpha = 0.05 |       |       |
|----------------------------------|-----|-------------------------|-------|-------|
|                                  |     | 1                       | 2     | 3     |
| Other rare or unusual etiologies | 105 | 79.12                   |       |       |
| Cardioembolic                    | 913 | 82.72                   | 82.72 |       |
| Undetermined                     | 377 | 83.92                   | 83.92 |       |
| Small Vessel Disease             | 229 |                         | 88.00 | 88.00 |
| Large Artery Disease             | 698 |                         |       | 94.29 |

Means for groups in homogeneous subsets are displayed.

a. Uses Harmonic Mean Sample Size = 262.177.

b. The group sizes are unequal. The harmonic mean of the group sizes is used. Type I error levels are not guaranteed.

**eGFR MDRD**

Tukey B<sup>a,b</sup>

| Subtype                          | N   | Subset for alpha = 0.05 |         |         |
|----------------------------------|-----|-------------------------|---------|---------|
|                                  |     | 1                       | 2       | 3       |
| Large Artery Disease             | 698 | 68.0377                 |         |         |
| Small Vessel Disease             | 229 |                         | 73.7030 |         |
| Cardioembolic                    | 913 |                         | 76.7792 | 76.7792 |
| Undetermined                     | 377 |                         | 76.8400 | 76.8400 |
| Other rare or unusual etiologies | 105 |                         |         | 80.0483 |

Means for groups in homogeneous subsets are displayed.

a. Uses Harmonic Mean Sample Size = 262.177.

b. The group sizes are unequal. The harmonic mean of the group sizes is used. Type I error levels are not guaranteed.
